# Supplementary material for: Accuracy of rapid point-of-care antigen-based diagnostics for SARS-CoV-2: an updated systematic review and meta-analysis with meta regression analyzing influencing factors
Source: bioRxiv or medRxiv preprint supplement (doi:10.1101/2022.02.11.22270831), 2022-02-15

S8 Fig. Forest plot for subgroup analysis by mean Ct-values for TP and FN samples  
 Caption: CI = confidence interval

**Subgroup      N Datasets    Total Sample Size    Pooled Mean Ct-value (95% CI)**

|                 |    |      |                   |
|-----------------|----|------|-------------------|
| True Positives  | 69 | 5083 | 22.2 (21.5, 22.8) |
| False Negatives | 78 | 2408 | 30.4 (29.7, 31.1) |

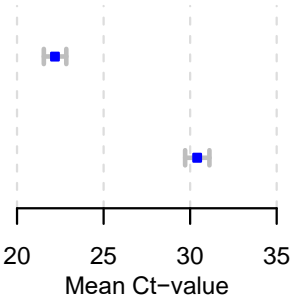

Supplement: Supplementary file [file media-18.pdf]
