# Supplementary material for: Accuracy of rapid point-of-care antigen-based diagnostics for SARS-CoV-2: an updated systematic review and meta-analysis with meta regression analyzing influencing factors
Source: bioRxiv or medRxiv preprint supplement (doi:10.1101/2022.02.11.22270831), 2022-02-15

S9 Fig. Forest plots for subgroup analysis by mean Ct-values for TP and FN samples

Caption: CI = confidence interval

Figure A – Forest plots of mean Ct-value for true positive samples

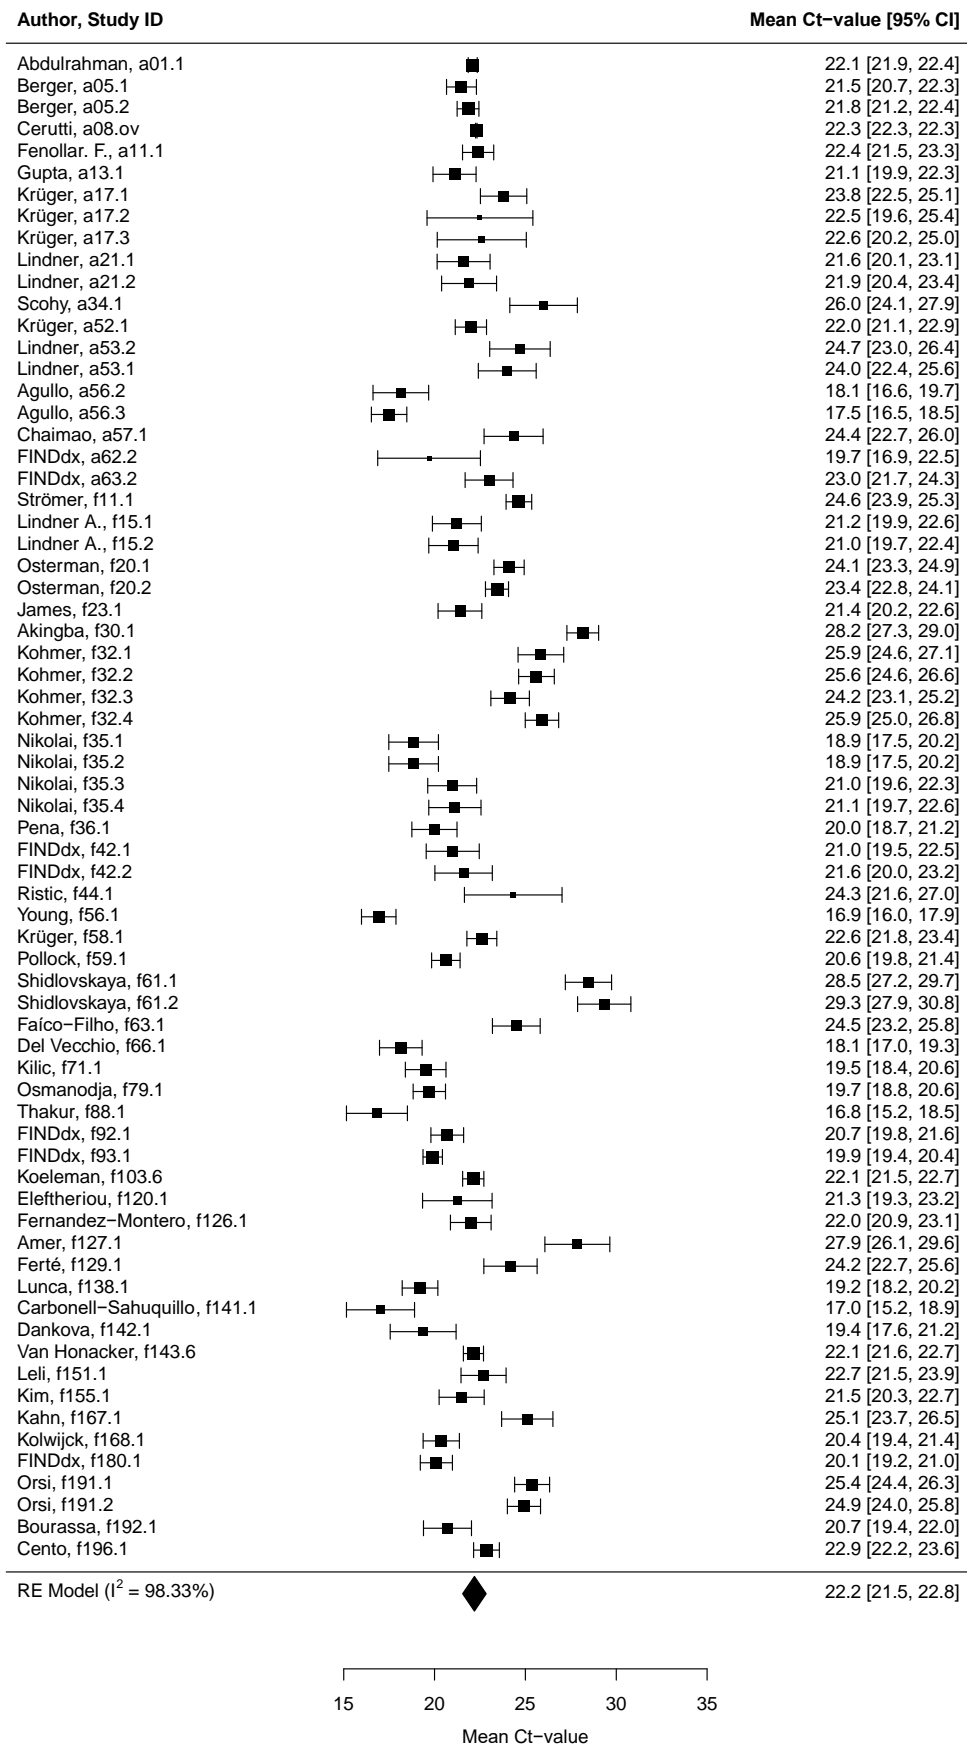

Figure B – Forest plots of mean Ct-value for false negative samples

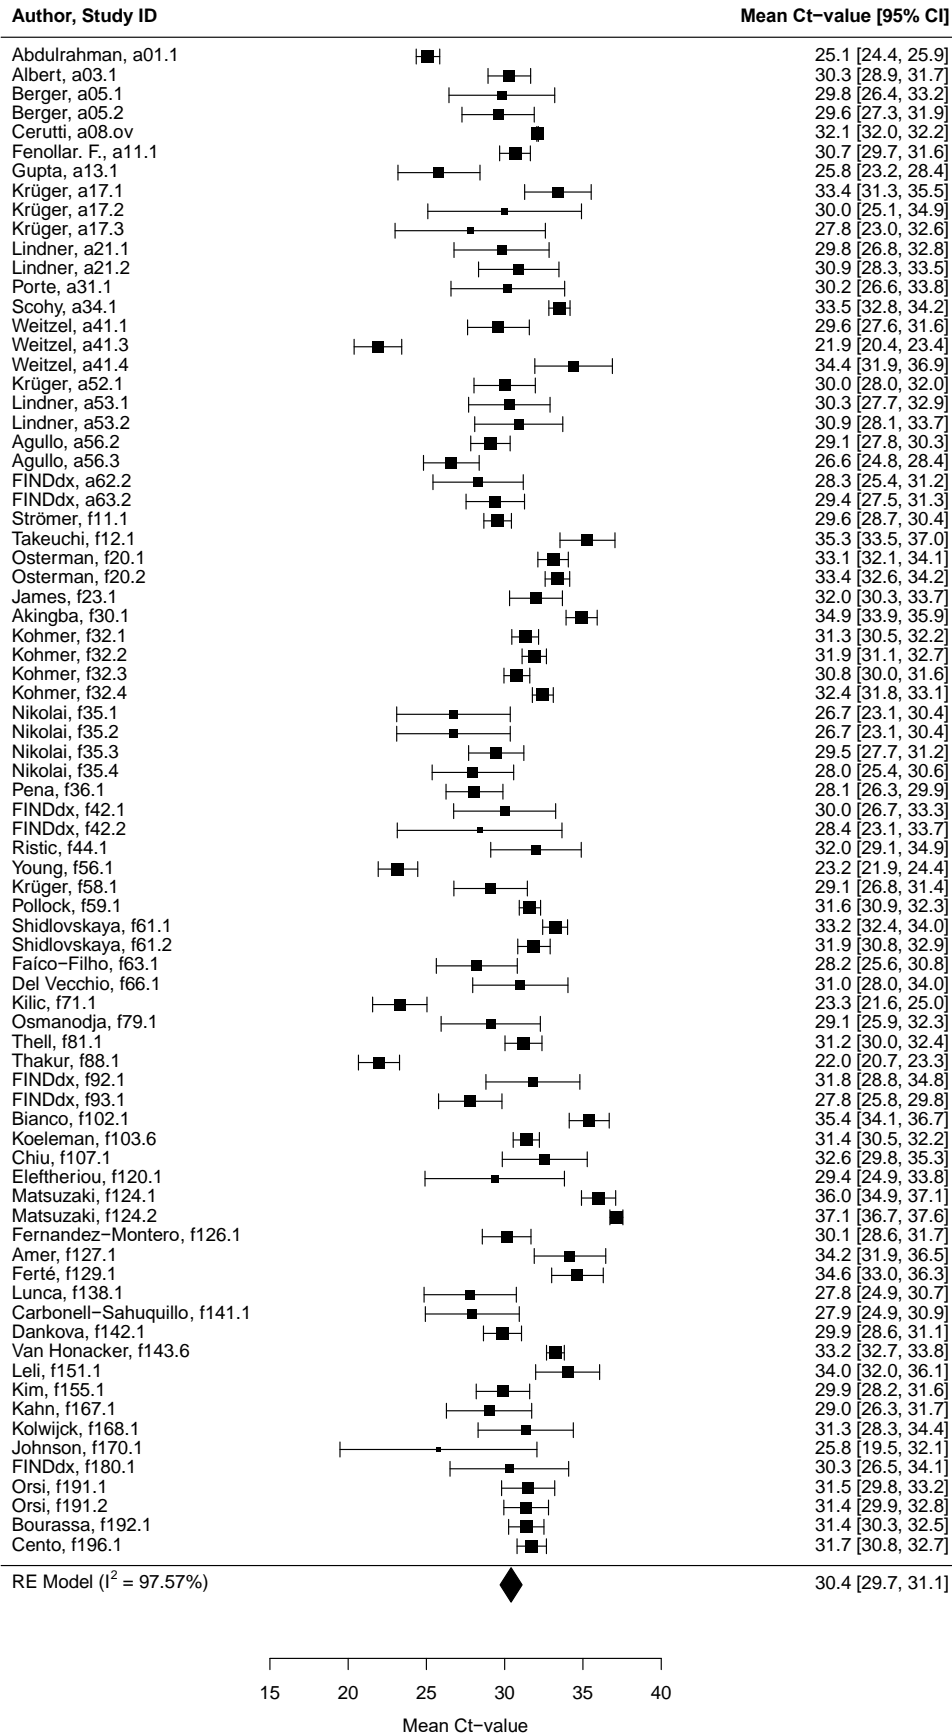

Supplement: Supplementary file [file media-19.pdf]
